# Supplementary material
Source: PubMed Central journal article supplement (PMC2861799)
Supplement: NIHMS177316-supplement-1.pdf [file NIHMS177316-supplement-1.pdf]

**a**

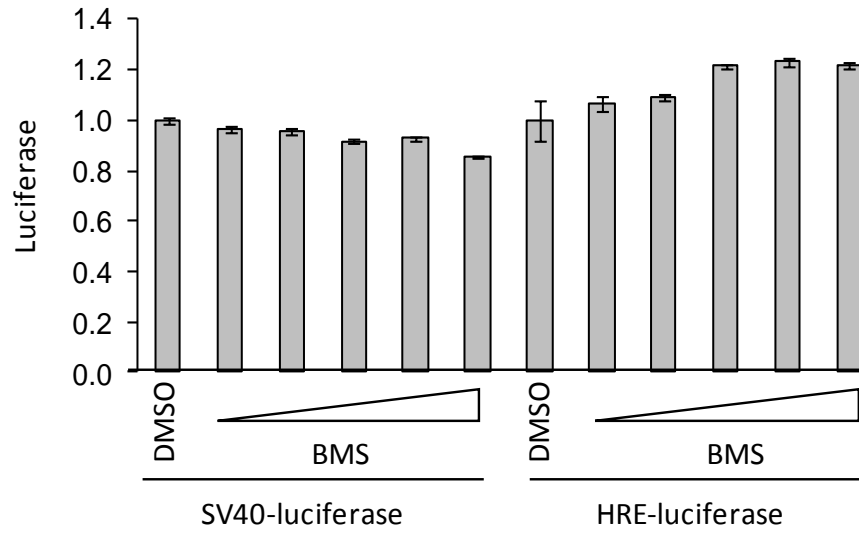

**b**

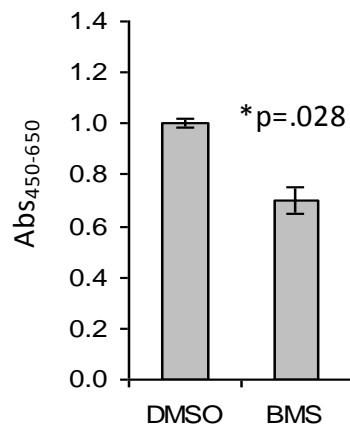

**SUPPLEMENTARY FIGURE 1**

**a**

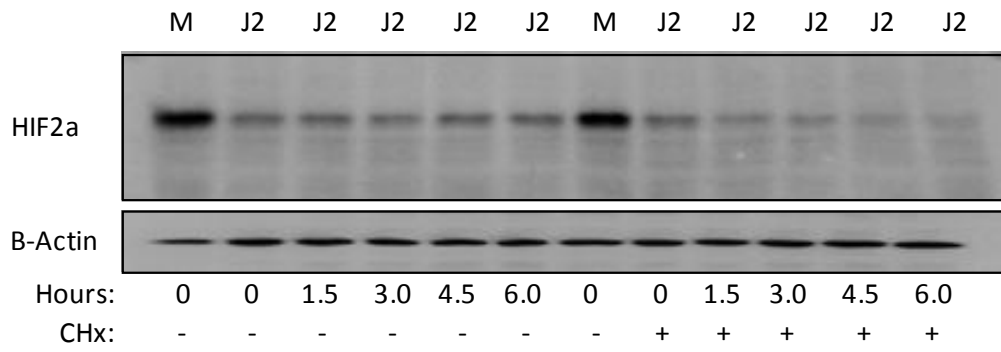

**b**

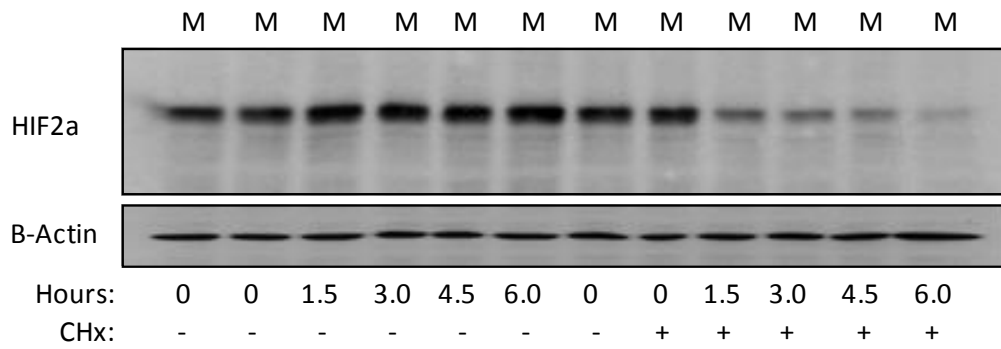

**SUPPLEMENTARY FIGURE 2**

**a**

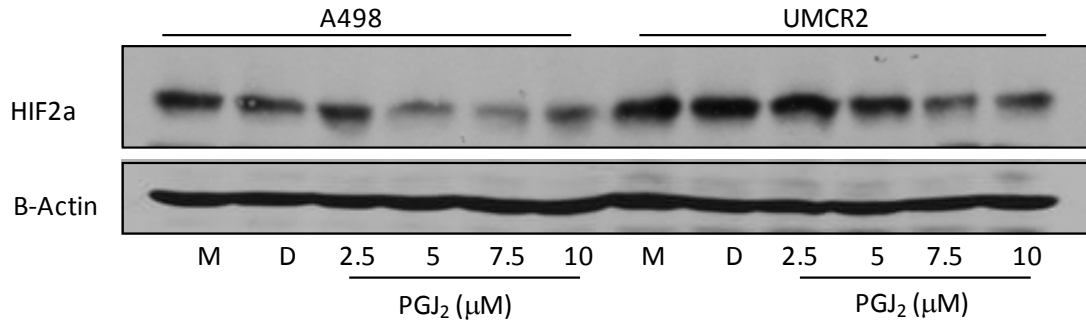

**b**

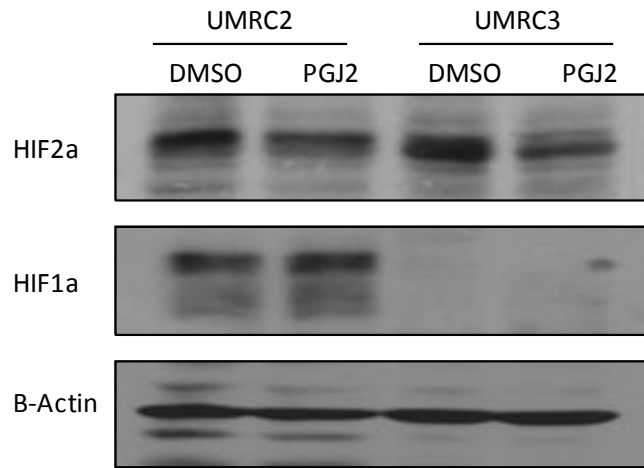

**SUPPLEMENTARY FIGURE 3**

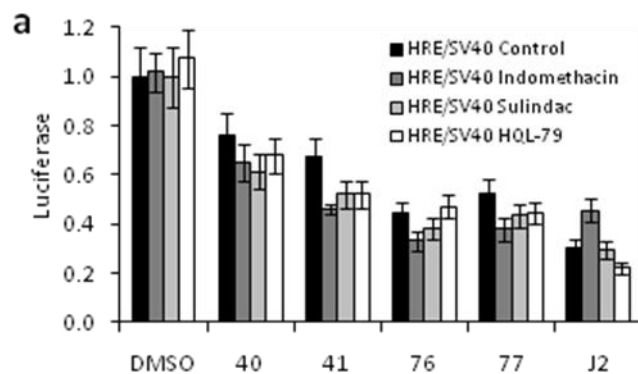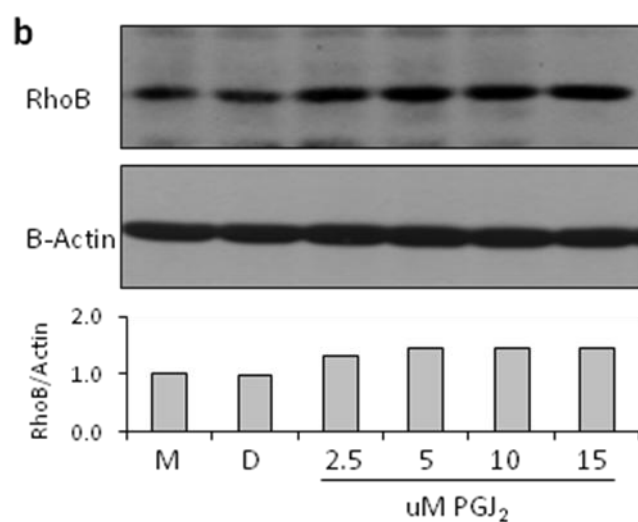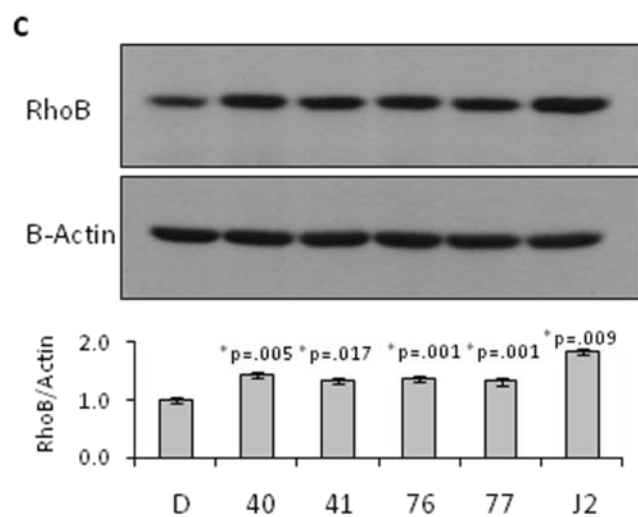

**SUPPLEMENTARY FIGURE 4**

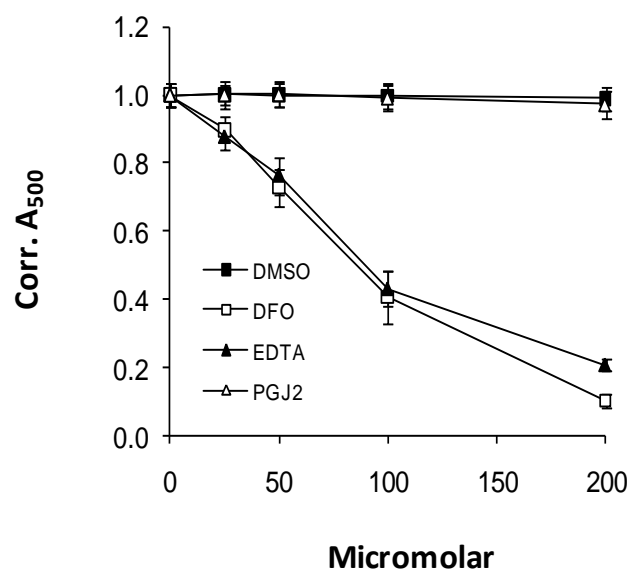

**SUPPLEMENTARY FIGURE 5**

**Supplementary Figure 1. NFkB inhibition does not affect activity of HIF2a.** (a) Normalized luciferase activity from stable SV40- and HRE-luciferase expressing 786-O cells, treated for 24 hours with the IKK Inhibitor BMS-345541, at the indicated concentrations, relative to DMSO-only treated control. (b) TransAM NFkB ELISA (Active Motif, cat.# 100627) demonstrating that basal NFkB activity is suppressed in 786-O cells when 5  $\mu$ M BMS-345541 is applied for 24 hours. Experiments were performed in triplicate. Error bars represent standard error of the mean (SEM).

**Supplementary Figure 2. PGJ<sub>2</sub> does not affect HIF-2a stability as measured by blocking *de novo* protein synthesis with cycloheximide.** (a) *Effect of PGJ<sub>2</sub> on HIF-2a protein stability.* 786-O cells were treated with PGJ<sub>2</sub> for 2 days, as described for Figure 1b. *De novo* protein synthesis was then halted by the addition of 10  $\mu$ g/mL cycloheximide (CHx) and time points taken every 1.5 hours for 6 hours. Lanes 1-6, control for HIF-2a expression without addition of cycloheximide (CHx) (lane 1, DMSO-only; lanes 3-6, 10  $\mu$ M PGJ<sub>2</sub>); lanes 7-12, HIF2a expression following the addition of CHx (lane 7, DMSO-only, lanes 8-12, 10  $\mu$ M PGJ<sub>2</sub> harvested at 0, 1.5, 3, 4.5 and 6 hours following the addition of CHx). B-Actin is shown for loading control. (b) *HIF2a protein stability in 786-O cells treated with DMSO-only.* Identical experiment as described above without addition of PGJ<sub>2</sub>.

**Supplementary Figure 3. Inhibition of HIF2a expression by PGJ<sub>2</sub> is not a cell specific phenomenon.** (a) *PGJ<sub>2</sub> inhibits HIF2a in several cell lines.* The VHL-null human renal cell carcinoma cell lines A498 and UMRC2 were treated with increasing

doses of PGJ<sub>2</sub> as indicated. HIF2a expression was analyzed by Western blot. B-actin loading control is shown. (b) *PGJ2 affects preferentially HIF2a but not HIF1a*. VHL-deficient UMRC2 and UMRC3 lines were treated with DMSO or 15 μM PGJ<sub>2</sub>. HIF1a, HIF2a and B-actin (loading control) expression was analyzed by Western blot.

**Supplementary Figure 4. Small molecule HIF2a inhibitors do not appear to increase endogenous PGJ<sub>2</sub> levels.** (a) *Cyclooxygenase 1/2 inhibition does not prevent the effect of PGJ2 or HIF2a inhibitors on HIF2a activity*. Luciferase assay showing the effect of compound and PGJ<sub>2</sub> treatment of 786-O derived HRE- over SV40 (control) luciferase reporter lines in the presence of 10 μM Sulindac, 10 μM Indomethacin (COX-1/2 inhibitors), or 50 μM HQL-79 (a PGD Synthase Inhibitor). (b) *PGJ2 upregulates the expression of the PPAR gamma target protein RhoB*. Western blot showing the effect of PGJ<sub>2</sub> on RhoB protein expression. 786-O cells were treated with the indicated concentrations of PGJ<sub>2</sub> for two days prior to harvesting. B-actin is shown for loading control. Densitometry of RhoB/B-actin expression for this specific experiment is shown in the lower panel. (c) *HIF2a inhibitors upregulate the expression of RhoB*. Western blot showing the effect of PGJ<sub>2</sub> and all compounds on RhoB protein expression. 786-O cells were treated for two days with 40 μM 40, 30 μM 41, 10 μM 76, 5 μM 77 or 10 μM PGJ<sub>2</sub>. B-actin is shown for loading control. Densitometry of RhoB/B-actin averaged from three independent Western blots is shown on bottom. Error bars represent Standard Error of the Mean (SEM).

**Supplementary Figure 5. PGJ<sub>2</sub> is not an iron chelator.** Displacement of iron from ethyl-3,4-dihydroxybenzoate (EDHB) complex was measured as a decrease in absorbance at 500 nm in the presence of PGJ<sub>2</sub>, EDTA or DFO.



## Supplementary Table 1. Signature of HIF2a inhibitors used for Connectivity

### Mapping.

| <u>40 up</u> | <u>41 up</u> | <u>76 up</u> | <u>77 up</u> | <u>40 down</u>                     | <u>41 down</u>                      | <u>76 down</u>                      | <u>77 up</u> |
|--------------|--------------|--------------|--------------|------------------------------------|-------------------------------------|-------------------------------------|--------------|
| 209160_at    | 209160_at    | 211653_x_at  | 208792_s_at  | 238737_at                          | 225660_at                           | 1557921_s_at                        | 211756_at    |
| 209699_x_at  | 211653_x_at  | 216594_x_at  | 1569577_x_at | 202833_s_at                        | 223449_at                           | 223449_at                           | 1556000_s_at |
| 204151_x_at  | 204151_x_at  | 204151_x_at  | 238084_at    | 1553589_a_at                       | 210905_x_at                         | 225660_at                           | 225660_at    |
| 211653_x_at  | 223333_s_at  | 206561_s_at  | 213988_s_at  | 207184_at                          | 222925_at                           | 201313_at                           | 207126_x_at  |
| 203889_at    | 241418_at    | 217678_at    | 201467_s_at  | 206023_at                          | 230746_s_at                         | 210905_x_at                         | 223449_at    |
| 216594_x_at  | 228824_s_at  | 242775_at    | 202434_s_at  | 202902_s_at                        | 210512_s_at                         | 1553589_a_at                        | 215125_s_at  |
| 201467_s_at  | 208792_s_at  | 228824_s_at  | 209099_x_at  | 222925_at                          | 223827_at                           | 215028_at                           | 208596_s_at  |
| 214211_at    | 209699_x_at  | 241418_at    | 1569303_s_at | 206461_x_at                        | 210538_s_at                         | 202833_s_at                         | 1556773_at   |
| 203665_at    | 217678_at    | 228825_at    | 205083_at    | 211429_s_at                        | 1557921_s_at                        | AFFX-<br>HUMISGF3A/M97<br>935_MA_at | 232654_s_at  |
| 206561_s_at  | 231897_at    | 209699_x_at  | 235085_at    | 208795_s_at                        | AFFX-<br>HUMISGF3A/M97<br>935_MB_at | AFFX-<br>HUMISGF3A/M97<br>935_5_at  | 208725_at    |
| 214307_at    | 206237_s_at  | 231897_at    | 1563445_x_at | 218834_s_at                        | 205670_at                           | AFFX-<br>HUMISGF3A/M97<br>935_MB_at | 232221_x_at  |
| 219874_at    | 210143_at    | 209160_at    | 216268_s_at  | 211756_at                          | 226907_at                           | 209969_s_at                         | 226907_at    |
| 242037_at    | 209921_at    | 235629_at    | 210224_at    | 223484_at                          | 209969_s_at                         | 206023_at                           | 215849_x_at  |
| 207528_s_at  | 201467_s_at  | 219475_at    | 228824_s_at  | 213785_at                          | 225681_at                           | 230746_s_at                         | 210355_at    |
| 205808_at    | 216594_x_at  | 201467_s_at  | 208791_at    | 225681_at                          | 202687_s_at                         | 220454_s_at                         | 204845_s_at  |
| 224346_at    | 209101_at    | 209921_at    | 231897_at    | 209754_s_at                        | 205575_at                           | 210538_s_at                         | 204532_x_at  |
| 208791_at    | 200800_s_at  | 210143_at    | 205952_at    | 232596_at                          | AFFX-<br>HUMISGF3A/M97<br>935_MA_at | 206758_at                           | 241950_at    |
| 209921_at    | 224609_at    | 208161_s_at  | 225386_s_at  | 230499_at                          | 221123_x_at                         | 202086_at                           | 205560_at    |
| 226248_s_at  | 226218_at    | 208792_s_at  | 211499_s_at  | 226869_at                          | 241950_at                           | 202687_s_at                         | 206094_x_at  |
| 202756_s_at  | 203889_at    | 204694_at    | 202437_s_at  | 228121_at                          | 1553589_a_at                        | 219630_at                           | 214890_s_at  |
| 1569303_s_at | 206561_s_at  | 239896_at    | 217892_s_at  | 242844_at                          | 230499_at                           | 235278_at                           | 241644_at    |
| 213350_at    | 228825_at    | 207528_s_at  | 202436_s_at  | 215726_s_at                        | 235278_at                           | 226907_at                           | 235278_at    |
| 210663_s_at  | 229441_at    | 204105_s_at  | 236321_at    | 222767_s_at                        | 215028_at                           | 1556773_at                          | 218149_s_at  |
| 204341_at    | 214211_at    | 228062_at    | 239823_at    | 241950_at                          | 236083_at                           | 221538_s_at                         | 203710_at    |
| 231735_s_at  | 228274_at    | 214211_at    | 230795_at    | 236277_at                          | 221801_x_at                         | 202710_at                           | 232004_at    |
| 225252_at    | 203665_at    | 236140_at    | 207813_s_at  | 201313_at                          | 235144_at                           | 234975_at                           | 230746_s_at  |
| 217388_s_at  | 217388_s_at  | 203343_at    | 215071_s_at  | 217165_x_at                        | 205302_at                           | 225681_at                           | 230352_at    |
| 208792_s_at  | 201107_s_at  | 209457_at    | 202275_at    | 226278_at                          | 203641_s_at                         | 214329_x_at                         | 220454_s_at  |
| 224559_at    | 235085_at    | 229879_at    | 203158_s_at  | 230352_at                          | 220454_s_at                         | 230352_at                           | 213652_at    |
| 222016_s_at  | 224990_at    | 226462_at    | 202803_s_at  | 225660_at                          | 226438_at                           | 202149_at                           | 201313_at    |
| 202017_at    | 200799_at    | 202053_s_at  | 202284_s_at  | 202430_s_at                        | 201313_at                           | 202796_at                           | 234924_s_at  |
| 214701_s_at  | 238084_at    | 202923_s_at  | 214446_at    | 206936_x_at                        | 226436_at                           | 232693_s_at                         | 209969_s_at  |
| 218246_at    | 225252_at    | 200748_s_at  | 201601_x_at  | 210117_at                          | 208608_s_at                         | 225601_at                           | 1557921_s_at |
| 213747_at    | 210663_s_at  | 218417_s_at  | 1557905_s_at | 219929_s_at                        | 202688_at                           | 241950_at                           | 210095_s_at  |
| 223577_x_at  | 200748_s_at  | 210519_s_at  | 205925_s_at  | 213169_at                          | 203037_s_at                         | 205302_at                           | 221916_at    |
| 205606_at    | 209457_at    | 210896_s_at  | 222457_s_at  | 222457_s_at                        | 203710_at                           | 232004_at                           | 205670_at    |
| 213998_s_at  | 1559462_at   | 225252_at    | 218825_at    | 226348_at                          | 218145_at                           | 227405_s_at                         | 218507_at    |
| 227616_at    | 220617_s_at  | 203665_at    | 202435_s_at  | 202073_at                          | 214890_s_at                         | 222925_at                           | 218145_at    |
| 217678_at    | 208791_at    | 223594_at    | 201058_s_at  | 206300_s_at                        | 238756_at                           | 222450_at                           | 202086_at    |
| 235589_s_at  | 210519_s_at  | 203925_at    | 209835_x_at  | 214329_x_at                        | AFFX-<br>HUMISGF3A/M97<br>935_5_at  | 225792_at                           | 202830_s_at  |
| 225116_at    | 204694_at    | 202201_at    | 206237_s_at  | 214095_at                          | 223216_x_at                         | 205670_at                           | 215028_at    |
| 226150_at    | 203343_at    | 201468_s_at  | 236175_at    | 228401_at                          | 205403_at                           | 209546_s_at                         | 224477_s_at  |
| 219882_at    | 207528_s_at  | 201118_at    | 202270_at    | 210017_at                          | 214329_x_at                         | 214532_x_at                         | 217289_s_at  |
| 206343_s_at  | 202201_at    | 202054_s_at  | 204734_at    | 215101_s_at                        | 244567_at                           | 214890_s_at                         | 239229_at    |
| 212224_at    | 219874_at    | 216959_x_at  | 202756_s_at  | 229235_at                          | 1553986_at                          | 221610_s_at                         | 223216_x_at  |
| 224568_x_at  | 225386_s_at  | 1569303_s_at | 202201_at    | 201436_at                          | 236261_at                           | 227598_at                           | 227405_s_at  |
| 236814_at    | 201058_s_at  | 242037_at    | 1565772_at   | 227110_at                          | 227812_at                           | 202073_at                           | 221801_x_at  |
| 1558678_s_at | 202581_at    | 229963_at    | 239202_at    | 225048_at                          | 203642_s_at                         | AFFX-<br>HUMISGF3A/M97<br>935_3_at  | 206026_s_at  |
| 202284_s_at  | 209797_at    | 202275_at    | 201939_at    | 210538_s_at                        | 222536_s_at                         | 212061_at                           | 222925_at    |
| 1556959_at   | 212848_s_at  | 238084_at    | 209806_at    | 210512_s_at                        | 200887_s_at                         | 202848_s_at                         | 214889_at    |
| 223940_x_at  | 221009_s_at  | 219508_at    | 202755_s_at  | AFFX-<br>HUMISGF3A/M97<br>935_3_at | 212427_at                           | 205575_at                           | 214095_at    |
| 226640_at    | 228205_at    | 207029_at    | 212014_x_at  | 204972_at                          | 204200_s_at                         | 210355_at                           | 212170_at    |
| 1568574_x_at | 205943_at    | 230560_at    | 1556959_at   | 225421_at                          | 218149_s_at                         | 202902_s_at                         | 212332_at    |
| 228928_x_at  | 209928_s_at  | 219874_at    | 223541_at    | 204326_x_at                        | 1570065_at                          | 219232_s_at                         | 221567_at    |
| 202648_at    | 206153_at    | 233540_s_at  | 214085_x_at  | 228565_at                          | 202833_s_at                         | 223216_x_at                         | 222847_s_at  |
| 211692_s_at  | 207029_at    | 202014_at    | 203904_x_at  | 212206_s_at                        | 202149_at                           | 226869_at                           | 228565_at    |
| 1552944_a_at | 202923_s_at  | 209135_at    | 203889_at    | 200887_s_at                        | 225671_at                           | 211756_at                           | 211138_s_at  |

|             |              |              |              |                                     |              |              |              |
|-------------|--------------|--------------|--------------|-------------------------------------|--------------|--------------|--------------|
| 217117_x_at | 201468_s_at  | 234986_at    | 209398_at    | 203276_at                           | 234975_at    | 203128_at    | 232693_s_at  |
| 227510_x_at | 202053_s_at  | 211124_s_at  | 1552546_a_at | 230746_s_at                         | 235890_at    | 210095_s_at  | 209967_s_at  |
| 210686_x_at | 201348_at    | 219295_s_at  | 230493_at    | 205395_s_at                         | 211756_at    | 222536_s_at  | 210905_x_at  |
| 213710_s_at | 208161_s_at  | 207469_s_at  | 203159_at    | 202149_at                           | 1555788_a_at | 201295_s_at  | 213506_at    |
| 224966_s_at | 242037_at    | 206153_at    | 204470_at    | 202687_s_at                         | 226189_at    | 218149_s_at  | 230958_s_at  |
| 215388_s_at | 213139_at    | 209735_at    | 1559462_at   | 218400_at                           | 236277_at    | 227812_at    | 201418_s_at  |
| 204384_at   | 236140_at    | 203159_at    | 237737_at    | AFFX-<br>HUMISGF3A/M97<br>935_MB_at | 206693_at    | 214889_at    | 208650_s_at  |
| 225118_at   | 220935_s_at  | 48106_at     | 201107_s_at  | 214974_x_at                         | 206025_s_at  | 228126_x_at  | 221123_x_at  |
| 237287_at   | 203925_at    | 213112_s_at  | 214307_at    | 215177_s_at                         | 234725_s_at  | 206026_s_at  | 209426_s_at  |
| 212070_at   | 201108_s_at  | 239001_at    | 210589_s_at  | 208296_x_at                         | 204597_x_at  | 223827_at    | 202848_s_at  |
| 219328_at   | 217841_s_at  | 224990_at    | 216716_at    | 203642_s_at                         | 219630_at    | 204597_x_at  | 233520_s_at  |
| 214333_x_at | 210220_at    | 220935_s_at  | 201108_s_at  | 217347_at                           | 205822_s_at  | 209183_s_at  | 205575_at    |
| 211019_s_at | 211124_s_at  | 228063_s_at  | 229396_at    | 1556773_at                          | 221916_at    | 204152_s_at  | 209424_s_at  |
| 224990_at   | 202017_at    | 1558199_at   | 239503_at    | 213518_at                           | 211488_s_at  | 221123_x_at  | 209772_s_at  |
| 228594_at   | 242775_at    | 1563445_x_at | 208579_x_at  | 1558330_x_at                        | 226869_at    | 218087_s_at  | 1555788_a_at |
| 212272_at   | 239896_at    | 219247_s_at  | 204823_at    | 201044_x_at                         | 238423_at    | 203642_s_at  | 221805_at    |
| 210022_at   | 234986_at    | 202260_s_at  | 226136_at    | 202688_s_at                         | 228565_at    | 230499_at    | 210761_s_at  |
| 235659_at   | 1563445_x_at | 204114_at    | 206074_s_at  | 201123_s_at                         | 206023_at    | 213785_at    | 205306_x_at  |
| 203679_at   | 201110_s_at  | 220254_at    | 204489_s_at  | 232004_at                           | 237328_at    | 208978_at    | 205942_s_at  |
| 205640_at   | 235274_at    | 203158_s_at  | 217996_at    | 223423_at                           | 205047_s_at  | 201418_s_at  | 228269_x_at  |
| 222675_s_at | 225175_s_at  | 232155_at    | 214605_x_at  | 206026_s_at                         | 203556_at    | 222809_x_at  | 240122_at    |
| 204227_s_at | 219475_at    | 202756_s_at  | 204222_s_at  | 238469_at                           | 231888_at    | 221916_at    | 214177_s_at  |
| 227549_x_at | 220922_s_at  | 208791_at    | 212665_at    | 203493_s_at                         | 202897_at    | 1555705_a_at | 210367_s_at  |
| 212274_at   | 218970_s_at  | 205808_at    | 213338_at    | 221610_s_at                         | 242329_at    | 204200_s_at  | 209496_at    |
| 227617_at   | 204385_at    | 56256_at     | 209911_x_at  | 202660_at                           | 212810_s_at  | 209558_s_at  | 235309_at    |
| 239067_s_at | 229879_at    | 225242_s_at  | 217997_at    | 229427_at                           | 242069_at    | 215849_x_at  | 218309_at    |
| 239208_s_at | 210589_s_at  | 217996_at    | 211320_s_at  | 1562836_at                          | 202643_s_at  | 205306_x_at  | 1569732_at   |
| 207714_s_at | 201266_at    | 209797_at    | 210916_s_at  | 200864_s_at                         | 207052_at    | 222934_s_at  | 216366_x_at  |
| 231763_at   | 208997_s_at  | 218000_s_at  | 204490_s_at  | 223449_at                           | 229800_at    | 207556_s_at  | 203126_at    |
| 223578_x_at | 228346_at    | 228928_x_at  | 211003_x_at  | 221765_at                           | 226722_at    | 214906_x_at  | 205920_at    |
| 205798_at   | 202054_s_at  | 220994_s_at  | 226218_at    | 229265_at                           | 206758_at    | 210512_s_at  | 209425_at    |
| 230341_x_at | 224826_at    | 204058_at    | 1554274_a_at | 240114_s_at                         | 213056_at    | 228565_at    | 205822_s_at  |
| 217173_s_at | 204341_at    | 202017_at    | 213028_at    | 224577_at                           | 232693_s_at  | 218995_s_at  | 212143_s_at  |
| 201373_at   | 219410_at    | 210544_s_at  | 204221_x_at  | 213470_s_at                         | 232004_at    | 222847_s_at  | 229925_at    |
| 216479_at   | 203810_at    | 203157_s_at  | 242037_at    | 207002_s_at                         | 210237_at    | 234987_at    | 218816_at    |
| 212844_at   | 233571_x_at  | 214307_at    | 206343_s_at  | 235890_at                           | 236979_at    | 213675_at    | 210601_at    |
| 211708_s_at | 49077_at     | 223333_s_at  | 223333_s_at  | 226326_at                           | 1559638_at   | 201242_s_at  | 205380_at    |
| 223200_s_at | 201939_at    | 206237_s_at  | 218843_at    | 91816_f_at                          | 210827_s_at  | 228987_at    | 221246_x_at  |
| 201810_s_at | 202014_at    | 220253_s_at  | 1560402_at   | 202904_s_at                         | 211372_s_at  | 209369_at    | 213437_at    |
| 212187_x_at | 237737_at    | 201348_at    | 214290_s_at  | 233899_x_at                         | 215244_at    | 227889_at    | 207713_s_at  |
| 242414_at   | 208998_at    | 204341_at    | 203157_s_at  | 209969_s_at                         | 227598_at    | 205067_at    | 222536_s_at  |
| 225254_at   | 212977_at    | 218970_s_at  | 209803_s_at  | 215436_at                           | 222934_s_at  | 206300_s_at  | 228302_x_at  |
| 208962_s_at | 239001_at    | 226258_at    | 231577_s_at  | 235940_at                           | 227907_at    | 210367_s_at  | 210827_s_at  |
